# Supplementary material
Source: publisher figshare collection journal article supplement (https://gsajournals.figshare.com/articles/dataset/_/14105972)
Supplement: Supplementary file 1 [file 1]

**Table S2. Primers used in PCR and RT-qPCR experiments**

|               |              | Forward               | Reverse               |
|---------------|--------------|-----------------------|-----------------------|
| Figure 3A     | green        | AAATCTCGGCCAGCGTGTA   | GTCTGGGTAACGGGAGAAGC  |
| Figure 3A     | cyan         | ATCACCCCTGGGTATGGACGA | TTGAAGGCGCAGCTGTAGAA  |
| Figure 6C     | <i>Dad</i>   | AACTGAAGCGACTGCCCACT  | TTTTGAGCGTTGGTACGGCG  |
| Figure S4A, B | <i>brat</i>  | AGTCCCCCGGAATGACAACC  | GGAAGCGAAGAAGTGGTGCG  |
| Figure S4A    | <i>asl</i>   | TGCAGGATCAGAAACGACGC  | AGCGGTTTATGGTGCGGATG  |
| Figure S4A, B | <i>hid</i>   | GTACCAGAGCCAGCAGAGTG  | CCGTGCGGAAAGAACACATC  |
| Figure S4A    | <i>Lox11</i> | GGCAAAAGTACACCTGTGGCA | ACATCGGTGTAGGTGTCTGCG |
| Figure S4A, B | <i>sin1</i>  | CTCCCACATCCGCAACTCCT  | TCATCGCTCAGCATCACCGT  |
| Figure S4A    | <i>upd3</i>  | AGATTCTGCCCCGTCTGAA   | TGTTGCGCATGTACGTGAAGG |
