# Supplementary material
Source: publisher figshare collection journal article supplement (https://gsajournals.figshare.com/articles/dataset/_/14105972)
Supplement: Supplementary file 2 [file 1]

**Table S1. Genotypes of fly strains**

|               |                                                                                                             |
|---------------|-------------------------------------------------------------------------------------------------------------|
| Figure 1C     | <i>trol:GFP/+; esg-GAL4 UAS-tdTomato/+</i>                                                                  |
| Figure 1D     | <i>Oregon-R</i>                                                                                             |
| Figure 2      | <i>Oregon-R</i>                                                                                             |
| Figure 3B, C  | <i>esg-GAL4 UAS-GFP CG6967[KI, smGFP-HA]/+</i>                                                              |
| Figure 3D     | <i>esg-GAL4 UAS-GFP CG6967[KI, smGFP-HA]/MyoIA-lacZ</i>                                                     |
| Figure 4A     | <i>esg-GAL4 UAS-GFP tub-GAL80[ts]/+; UAS-FLP Act&gt;CD2&gt;GAL4/+</i>                                       |
| Figure 4A     | <i>esg-GAL4 UAS-GFP tub-GAL80[ts]/+; UAS-FLP Act&gt;CD2&gt;GAL4/UAS-CG6967</i>                              |
| Figure 4C     | <i>w[1118]</i>                                                                                              |
| Figure 4C     | <i>CG6967[KO, tdTomato]/CG6967[18]</i>                                                                      |
| Figure 5A     | <i>AGO1:GFP/esg-lacZ</i>                                                                                    |
| Figure 5C     | <i>esg-GAL4 UAS-tdTomato/+; tub-GAL80[ts]/+</i>                                                             |
| Figure 5D     | <i>esg-GAL4 UAS-tdTomato/UAS-AGO1[RNAi, TRiP.HMC03509]; tub-GAL80[ts]/+</i>                                 |
| Figure 5E     | <i>esg-GAL4 UAS-tdTomato/+; tub-GAL80[ts]/+</i>                                                             |
| Figure 5E     | <i>esg-GAL4 UAS-tdTomato/UAS-AGO1[RNAi, TRiP.HMC03509]; tub-GAL80[ts]/+</i>                                 |
| Figure 6D     | <i>Dad:GFP/MyoIA-lacZ</i>                                                                                   |
| Figure 6E     | <i>MyoIA-GAL4/+; tub-GAL80[ts]/+</i>                                                                        |
| Figure 6E     | <i>MyoIA-GAL4/+; tub-GAL80[ts]/UAS-Dad[RNAi, TRiP.HMS01102]</i>                                             |
| Figure 6F     | <i>esg-GAL4 UAS-GFP tub-GAL80[ts]/+; UAS-FLP Act&gt;CD2&gt;GAL4/+</i>                                       |
| Figure 6F     | <i>esg-GAL4 UAS-GFP tub-GAL80[ts]/+; UAS-FLP Act&gt;CD2&gt;GAL4/UAS-CG6967</i>                              |
| Figure 6F     | <i>esg-GAL4 UAS-GFP tub-GAL80[ts]/UAS-Dad; UAS-FLP Act&gt;CD2&gt;GAL4/UAS-CG6967</i>                        |
| Figure 6F     | <i>esg-GAL4 UAS-GFP tub-GAL80[ts]/+; UAS-FLP Act&gt;CD2&gt;GAL4/UAS-CG6967 UAS-Dad[RNAi, TRiP.HMS01102]</i> |
| Figure 6G     | <i>w[1118]</i>                                                                                              |
| Figure 6G     | <i>CG6967[KO, tdTomato]/CG6967[18]</i>                                                                      |
| Figure 6G     | <i>CG6967[KO, tdTomato] tkv[7]/CG6967[18]</i>                                                               |
| Figure 7A     | <i>Oregon-R</i>                                                                                             |
| Figure 7B     | <i>esg-GAL4 UAS-GFP tub-GAL80[ts]/+; UAS-FLP Act&gt;CD2&gt;GAL4/+</i>                                       |
| Figure 7B     | <i>esg-GAL4 UAS-GFP tub-GAL80[ts]/ UAS-LUC-mir-1; UAS-FLP Act&gt;CD2&gt;GAL4/+</i>                          |
| Figure 7B     | <i>esg-GAL4 UAS-GFP tub-GAL80[ts]/ UAS-miR-1SP attP40; UAS-FLP Act&gt;CD2&gt;GAL4/ UAS-miR-1SP attP2</i>    |
| Figure S1A, B | <i>CG6967[KI, smGFP-HA]/ CG6967[KI, smGFP-HA]</i>                                                           |
| Figure S2     | <i>AGO1:GFP[CA06914]/ CG6967[KI, smGFP-HA]</i>                                                              |
| Figure S3B    | <i>ap-GAL4 Dad:GFP/+</i>                                                                                    |
| Figure S3C    | <i>ap-GAL4 Dad:GFP/+; UAS-Dad[RNAi, TRiP.HMS01102]/+</i>                                                    |
| Figure S4A    | <i>w[1118]</i>                                                                                              |
| Figure S4A    | <i>CG6967[KO, tdTomato]/CG6967[18]</i>                                                                      |
| Figure S4B    | <i>esg-GAL4 UAS-tdTomato/+; tub-GAL80[ts]/+</i>                                                             |
| Figure S4B    | <i>esg-GAL4 UAS-GFP tub-GAL80[ts]/+; UAS-FLP Act&gt;CD2&gt;GAL4/UAS-CG6967</i>                              |
