# Supplementary material
Source: publisher figshare collection journal article supplement (https://gsajournals.figshare.com/articles/dataset/_/14105972)
Supplement: Supplementary file 3 [file 1]

## Supplemental Figures

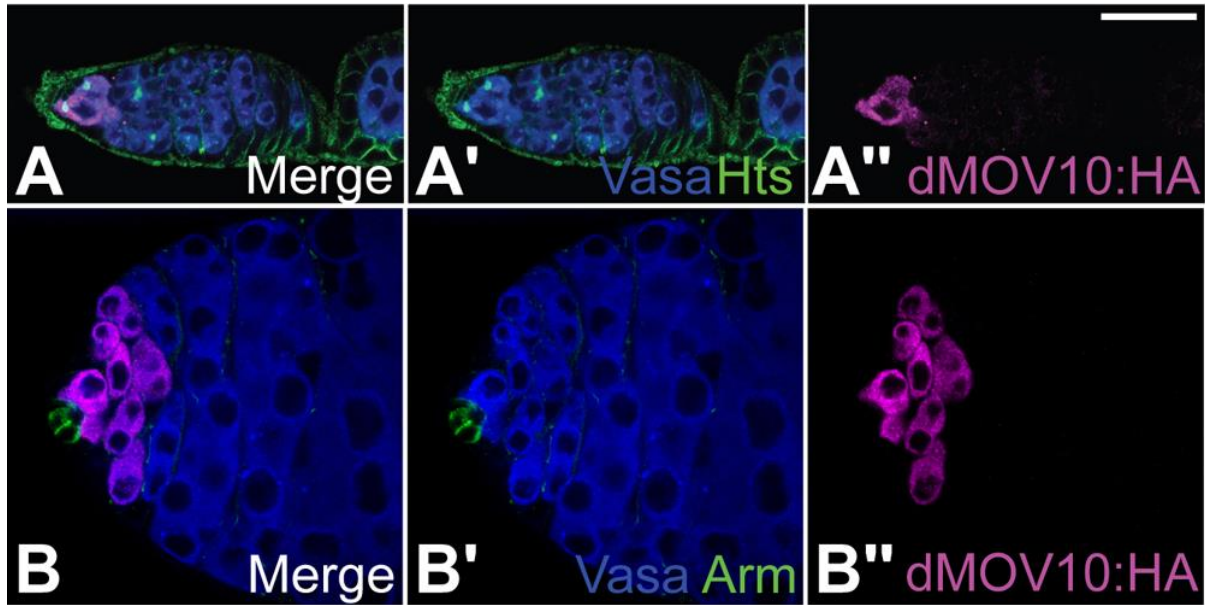

**Figure S1. dMOV10 expression in the ovary and testis.**

(A) A germarium, the most anterior structure of the ovary, of *dMOV10-HA* allele was dissected from female flies on day-4 after eclosion. The sample was stained for dMOV10-HA (magenta), Hu-li tai-shao (Hts, green), Vasa (blue; germline cells). Hts marks round spectrosomes characteristic of germline stem cells (GSCs). (B) A testis of *dMOV10-HA* stained for dMOV10-HA (magenta), Armadillo (Arm; a hub marker, green), and Vasa (blue). Scale bars: 50  $\mu$ m.

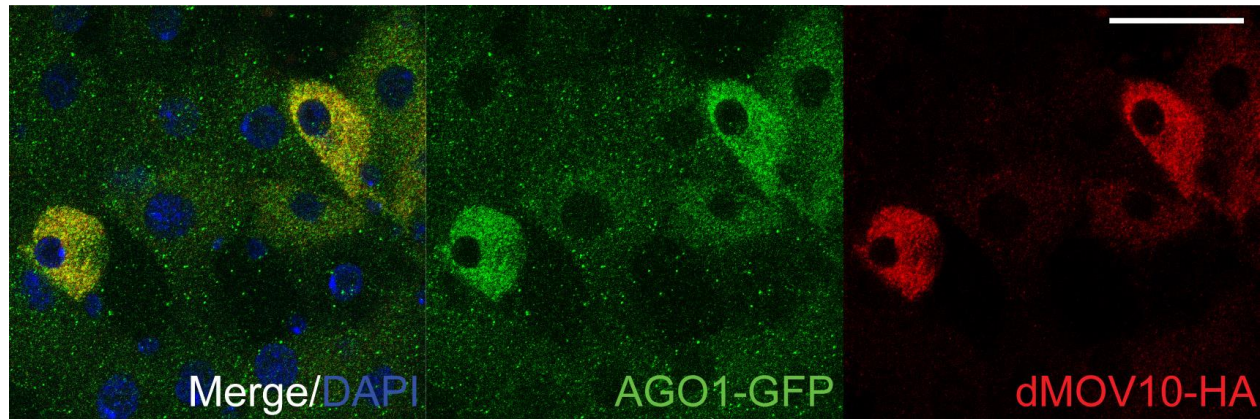

**Figure S2. Colocalization of AGO1 and dMOV10.**

A midgut sample from adult flies bearing AGO1-GFP and dMOV10-HA transgenes was dissected at day-3 after *Pe* infection. AGO1 and dMOV10 protein expression was revealed by staining with anti-GFP (green) and anti-HA (red) antibodies, respectively. Scale bar: 25  $\mu$ m.

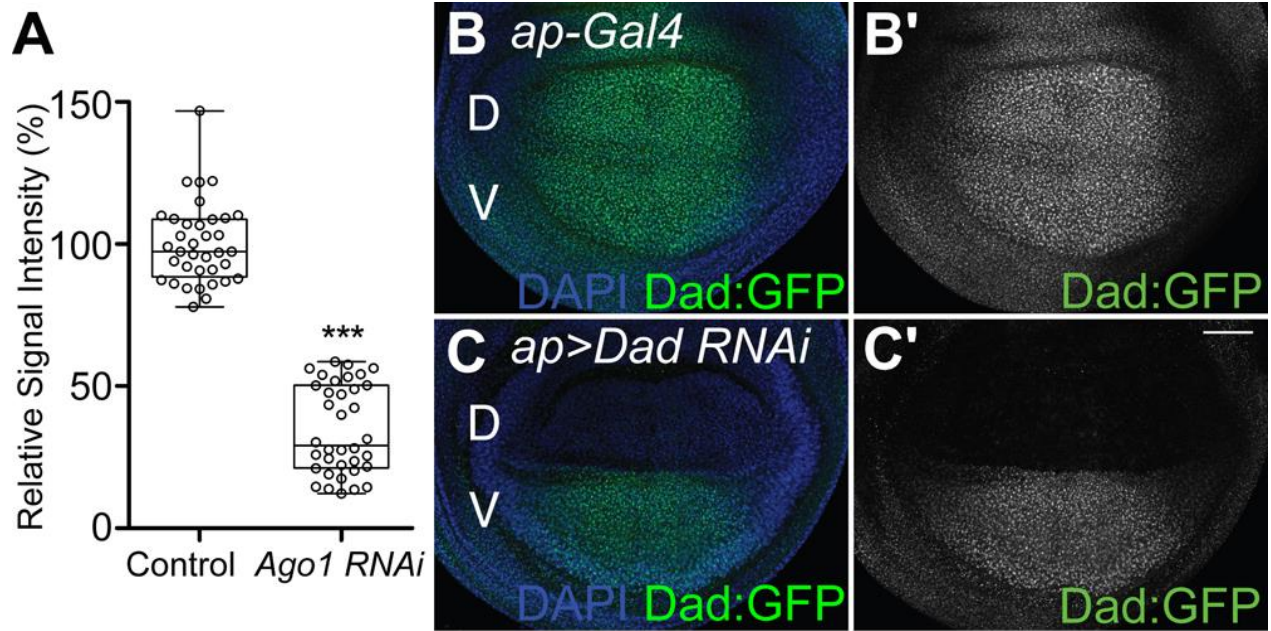

**Figure S3. Validation of RNAi knockdown for *AGO1* and *Dad*.**

(A) Efficacy of AGO1 RNAi knockdown. Relative signal intensity of AGO1-GFP in tdTomato-positive cells in control midgut (*esg<sup>ts</sup>>tdTomato*) and midgut expressing *UAS-AGO1 RNAi* (*esg<sup>ts</sup>>AGO1<sup>RNAi</sup>*) was quantified (see also Fig. 5C and D). \*\*\* $P < 0.001$ . The P value was calculated using the Wilcoxon rank sum test. (B-C) Wing discs showing the Dad:GFP expression. Dad is widely expressed in the wing disc with higher levels in the central domain (B). Expression of *UAS-Dad RNAi* using *ap-GAL4* depletes *Dad* expression in the dorsal compartment of the wing disc (C). D and V show the positions of the dorsal and ventral compartments, respectively. Dad:GFP, green; DAPI, blue. Scale bar: 50  $\mu\text{m}$ .

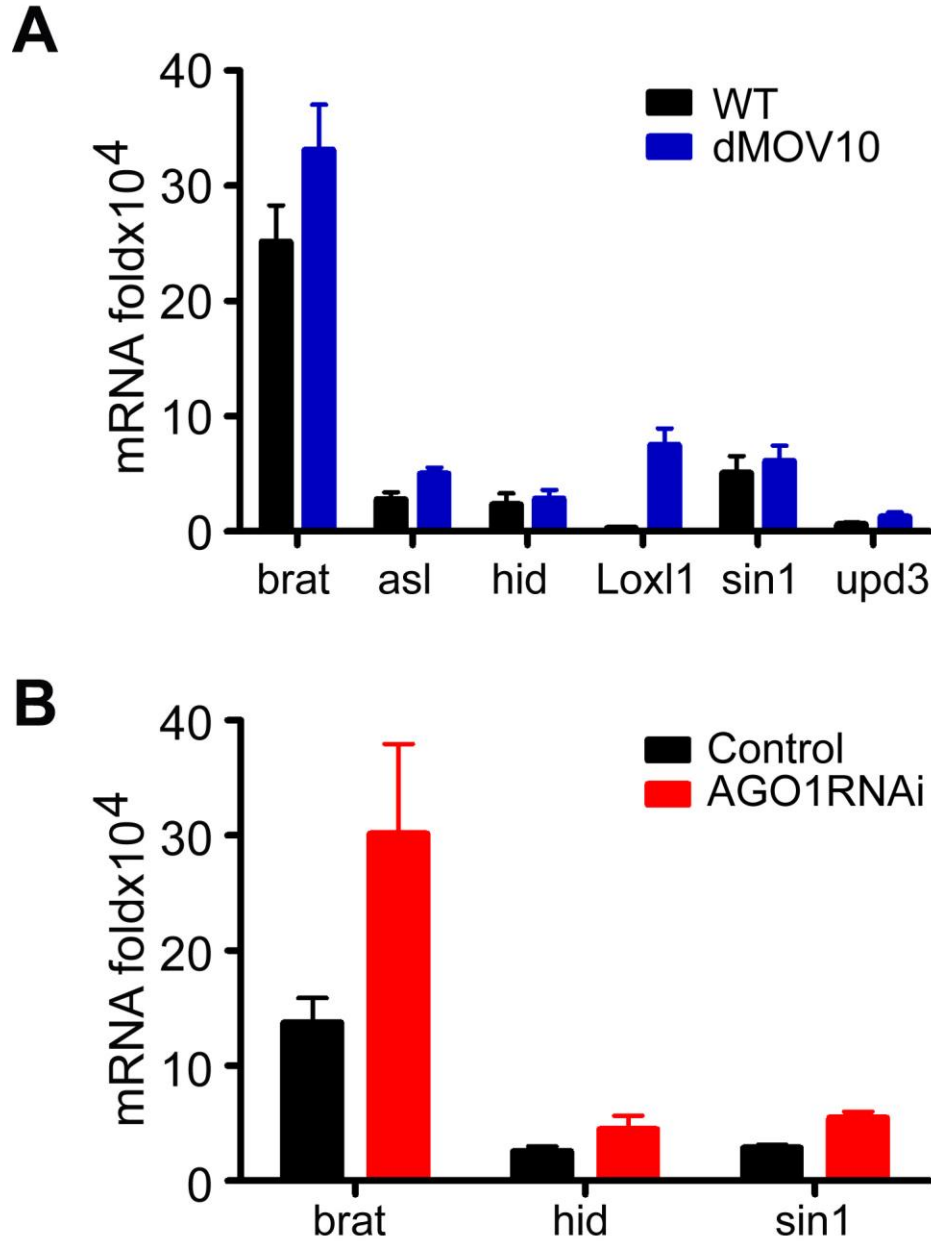

**Figure S4. Late miRNA targets are affected by *dMOV10* and *AGO1*.**

(A) RT-qPCR results comparing the levels of *brat*, *asl*, *hid*, *Loxl1*, *sin1*, and *upd3* mRNAs in wild-type (WT) and *dMOV10*<sup>KO</sup>/*dMOV10*<sup>l8</sup> (*dMOV10*) at day-3 after *Pe* infection. Higher levels of these transcripts were detected in *dMOV10* mutants compared to wild-type control at various degrees. (B) RT-qPCR results comparing the levels of *brat*, *hid*, and *sin1* mRNAs in *esg*<sup>ts</sup>-*Gal4* (Control) and *esg*<sup>ts</sup>>*AGO1*<sup>RNAi</sup> (*AGO1*RNAi) at day-3 after *Pe* infection.
